# Supplementary material for: Regulation of alternative splicing in Drosophila by 56 RNA binding proteins
Source: Genome Res. 2015 Nov;25(11):1771–80. doi: 10.1101/gr.192518.115 (PMC4617972; doi:10.1101/gr.192518.115)
Supplement: Supplemental Material [file supp_gr.192518.115_SuppTable_1.xlsx]

## Sheet: Sheet1
Gene Name	CG number	Synonyms	Contains RRM or KH	Category	Aligned Reads
tra2	CG10128	tra2	RRM	Prior	40122191
x16	CG10203	xl6, 2/30, 9G8, Dxl6, RBP1-like, TN166	RRM	SR	27059564
Rm62	CG10279	Rm62, 4136, DmRH8, Dmp68, Lip, p68		Core	35649044
nonA-l	CG10328	nonA-l, Z, LD09360	RRM	Prior	22752024
Hrb27C	CG10377	Hrb27c, 10280, Hrb48, Hrp48, RRM7, Rbp7, linha, p50	RRM	hnRNP	18352508
B52	CG10851	B52, SRp55, E(Dfd), E726, MabB52, RRM8, Rbp8	RRM	SR	40726336
Ref1	CG1101	Aly, REF1	RRM	EJC	26267072
Caper	CG11266	CAPER, HCC1	RRM	Prior	25766498
Hrb87F	CG12749	RO87F, Hrb87F, hrp36, hrb2, hrb85CD, Hrb87F, Hrb87Fa, P11, Q14, Q16, hrp40, p38	RRM	hnRNP	21184672
HnRNP-K	CG13425	ROK, bl, Hrb57A, Q18	KH	hnRNP	48385744
Upf1	CG1559	Upf1		EJC	27604682
CG1646	CG1646	Prp39		Core	39850917
RnpS1	CG16788	RnpS1, DEK	RRM	EJC	22371356
sqd	CG16901	RO40, sqd, CG17791, Hrp40, Hrb87, Hrb87Fb, RRM3, hnRNP 1	RRM	hnRNP	22104329
Rbp1	CG17136	Rbp1, RRM1	RRM	SR	21199162
Syp	CG17838	ROQR, Al945337	RRM	hnRNP	22507820
Sxl	CG18350	Sxl, CG33070, Fl, Mex156, Su(da), Sx1, Sxl-2	RRM	Prior	42139744
ytr	CG18426	RY1, ytr, b(2)gcn, bgcn		hnRNP	29467916
Rbp1-like	CG1987	Rbp1-like, i159	RRM	SR	23424420
CG30122	CG30122	ROU, CG18610, CG5477, LD11002		hnRNP	33269298
heph	CG31000	heph, CG2094, CG2290, PTB, ema	RRM	hnRNP	21233917
Cnot4	CG31716	NOT4, CG5244, CG5251	RRM	No Prior	31577806
shep	CG32423	alan-shepard, CG10647, CG10649, CG10668	RRM	No Prior	31632015
spoon	CG3249	PKAAP	KH	No Prior	46118222
mask	CG33106	mask, CG18671, CG31138, CG6268, CG6313	KH	No Prior	30318389
Rnp4F	CG3312	Rnp4F, 4F-rnp, rnp-4f	RRM	Core	35175798
qkr58E-3	CG3584	qkr58E-3, KEP1	KH	Prior	27874478
elav	CG4262	elav, 44C11, 9F8A9, EC7, Elav-9F8A9, elav-1, elav-2, elav-3, fliJ	RRM	Prior	41447570
Srp54	CG4602	Srp54, p75	RRM	SR	34641388
bol	CG4760	bol, Boule, CG4727	RRM	No Prior	35380355
qkr54B	CG4816	qkr54B, SAM, SAM50, p62GAP	KH	No Prior	20176326
eIF3-S9	CG4878	eIF3-S9	RRM	No Prior	28001239
msi	CG5099	MUSa, msi, DMSIDNA, SIDNA	RRM	hnRNP	20776134
Dp1	CG5170	Dp1, DDP1	KH	No Prior	27102731
Rox8	CG5422	Rox8, DmTIAR, RRM12	RRM	Prior	42685633
SC35	CG5442	SC35	RRM	SR	40686826
Rsf1	CG5655	Rsf1, ROX21	RRM	SR	57170053
qkr58E-2	CG5821	qkr58E-2	KH	No Prior	29973777
SF1	CG5836	SF1, p70	KH	Core	23983907
barc	CG6049	Tat-SF1	RRM	Prior	24836500
Fmr1	CG6203	Fmr1, AT24755, EP(3)3517, FMRP, FXR, dFMR, dFXR1, fmr	KH	No Prior	30216799
CG6227	CG6227	Prp5, DmRH29		Core	22443206
RpS3	CG6779	RpS3	KH	No Prior	37568498
CG6841	CG6841	Prp6		Core	33743278
glo	CG6946	ROFH, glo	RRM	hnRNP	24044390
mub	CG7437	PCB, mub	RRM	hnRNP	25561241
CG7878	CG7878	DmRH26	KH	Prior	52621232
CG7971	CG7971	SR300		Prior	20510698
hay	CG8019	hay, DhR25, DhXPB, DmXpB, ERCC3, TFIIH, XPB, hwr, i50, nc2		Prior	30554615
pea	CG8241	Prp22, pea		Core	25713056
eIF3ga	CG8636	eIF3-S4	RRM	No Prior	37325780
snRNP-U1-70K	CG8749	snRNP70K, 70K, U1 70K, U1 70K snRNP, U1 snRNP, U1-70K, snRNP, snRNP27D	RRM	Core	27180736
tsu	CG8781	tsu, Y14	RRM	EJC	34856806
Psi	CG8912	Psi	KH	Prior	30996531
rump	CG9373	ROM	RRM	hnRNP	58735925
rin	CG9412	rin, nts, rasp	RRM	Prior	35309209
Hrb98DE	CG9983	ROA1, Hrb98DE, hrp38, Pen9, Hrb1, p9	RRM	hnRNP	21736670
