# Supplementary material for: Regulation of alternative splicing in Drosophila by 56 RNA binding proteins
Source: Genome Res. 2015 Nov;25(11):1771–80. doi: 10.1101/gr.192518.115 (PMC4617972; doi:10.1101/gr.192518.115)
Supplement: Supplemental Material [file supp_gr.192518.115_SuppTable_2.xlsx]

## Sheet: Sheet1
Forward Primer Name	Forward Primer Sequence	Reverse Primer Name	Reverse Primer Sequence
CG6946FP	GCAAGCTGAACAAGGCCAG	CG6946RP	ACCCAGAGAAGAACTCCTC
CG9373FP	GTCGCAATTGCCGGGTCTAC	CG9373RP	CATTCACCTCATAGCGGTTC
CG5099FP	GCAGACAAAGCGCCACCGTG	CG5099RP	CACGCCGGCACCACGGGCTC
CG9983FP	GCAGAATGACCAACAGGGAG	CG9983RP	CACCACCGAAGCTGTTGTTG
CG12749FP	TCCAACGGAAACTACGACG	CG12749RP	AGTACGTGATGAAACCGAAG
CG17838FP	GATCTACAAAACCGGCAAG	CG17838RP	CTTGATCTTGTCCTCGTCG
CG16901FP	GGAGGATATGCAACCCTCTC	CG16901RP	CACGATGAAGGCGAATCCTC
CG13425FP	GGTTCGTGAGGTGATCACAC	CG13425RP	ACCGCCAGCATTGAATCCTC
CG30122FP	GAGTGAATAAGCGTGTGTG	CG30122RP	CACGGGAGCAGCTTGCAC
CG4602FP	GACAATCCGTGATGTCTC	CG4602RP	GTTCTTGAGCATCTCCAG
CG5655FP	TGTCGGCAATCTGACCGAC	CG5655RP	CCTTTTGAGATCTCCACG
CG1987FP	ATCGTCGCGACGCTGAGGATG	CG1987RP	AGCGTGATCTATAGCGTCCAC
CG10203FP	GAAGCAACTCATTCAGCAG	CG10203RP	TCGTGGTCGCTGTACCTCG
CG17136FP	TCCCGCAATACTCACGATAC	CG17136RP	AGGCGAAACCTGGTGGATTG
CG5442FP	AGGATCTGCGTCGGGTCTTC	CG5442RP	ACCACTGGAGCTGCGAGTG
CG10851FP	TTAGCTGGCAGGATCTCAAG	CG10851RP	AGCGGCGAGAGCGAGAAC
CG18426FP	TCAGCTGCAGTCGACGACG	CG18426RP	AGTGCGTTTCGGGCTGTG
CG7971FP	ACAGGCAACGTTCCAAGGAG	CG7971RP	TGTCGTTAACAGTATCCTCG
CG10128FP	CAAGCCGCTGCATAGGAG	CG10128RP	ACGGCGACCATCCACTTC
CG31000FP	AGCTCTCAAGCGTCGCTTG	CG31000RP	GGCTCCAGTTTGGCCTTC
CG7437FP	TCGAAGAGTGGTGCTCGCAG	CG7437RP	TCTGATAGATGCACTGGGTG
CG1559FP	AAGCAACCCAGCGAACAG	CG1559RP	CCAAAGGTCTTCTCGTACTG
CG5821FP	AAGGGCAACTCACTGCGTC	CG5821RP	TGAGGTACCGCCGAATCTC
CG5836FP	GGAACGCACACATGTGAAC	CG5836RP	GAATCCTTTGTTGCCTCCAG
CG3249FP	AGCAGTGATGAGAAGGACAG	CG3249RP	CTCGAAATCCTCGTCTATG
CG7878FP	GCAGATCCGGAAGGTGATG	CG7878RP	GTCCATGTCATCCTCCATC
CG33106FP	ATCAACCGAAAGCACCAG	CG33106RP	CGTCAGTGGCTCATTCTTGG
CG6203FP	GACGGCGTCACCAACATCG	CG6203RP	CTCTTGTCCACAATCTCCTG
CG8912FP	GTCGCTCCAGTAACGACAC	CG8912RP	TGATCGTCAACAGCACCTC
CG5170FP	GAGAACGTTGACAGGGCTG	CG5170RP	CTCGATACGGATGTTGTTC
CG6779FP	ATCATCATGGCCACCAAGAC	CG6779RP	ACACCATAGCAAGCACGAC
CG31716FP	GCAGCACAAGTACTGAGAC	CG31716RP	CTGCAGGTGCTGGAGCAG
CG4878FP	TCGAGAGTGTGGTGGTAGTG	CG4878RP	TGGCCTGCTTGTACTCCATG
CG9412FP	GTACTACACGCTGTTGAAC	CG9412RP	CATCAACCTGGCTGATCTTC
CG6049FP	GGACAAATCAAGGGCGATG	CG6049RP	TTTATCTGGACGCCAATC
CG8636FP	CATCATGCAGTTCCTCAAC	CG8636RP	CGAAGCCTTCTTCTCCATC
CG16788FP	TCAGCCAGTCGTTCACGATC	CG16788RP	CTACGGGAAACTCCACATTC
CG1101FP	GAAGCCAGGAAGCGTGCTC	CG1101RP	CGTAGTCCAGGTTACCGAC
CG8781FP	CAGGAGGACGAGATTCAG	CG8781RP	GTCAACCTGAATGGTCTGTC
CG32423FP	ATGGAGTCAGCGTGAACGTG	CG32423RP	TGTATGAGGTTACTCCCAG
CG8749FP	TCGGGAAAATACTTGGTCTG	CG8749RP	CTCCCGTGCCGCGAACAG
CG11266FP	TCGATGATCCTGAGTCCGTG	CG11266RP	TCGGTAATGTTGAAGTGCAG
CG10328FP	TGGACCCACCCATGAGTTG	CG10328RP	TGGTAGTAGTCTAGCCTCAG
CG10377FP	ACGGCAAGGTCACCGAGGTG	CG10377RP	CAAGCTTGCCATAGGCGCCTC
CG18350FP	CGCAACAAGCGGCTTAAGG	CG18350RP	ACGACCTGTGAGCTTGTCAC
CG5422FP	ACTGGTCCACGCGCAAGCTG	CG5422RP	TTGAAGACCCGCACGTCCTG
CG4760FP	TCTTTGTGGGTGGCATCAG	CG4760RP	TCACCATCCGCTTGCAGTC
CG3312FP	ACAGTGAGGTGTCCAGTGAC	CG3312RP	CCAGGCGGGCCTTTAGATAC
CG4262FP	TGCAGCAGCAACAACAGCAG	CG4262RP	GATCTCGTCTTCGGTCATTG
CG8241FP	CTAGCCAGGAGAAAACTGTC	CG8241RP	TGGTCTTACCAATGTGGCAC
CG1646FP	GCAGTCATGAATCAAGCAC	CG1646RP	CTTTGACAGCTCTCCAGTAC
CG6227FP	TGAGCCTGCACGGCGGCATC	CG6227RP	CTCCGGTGTGATAAACGTGT
CG6841FP	TGGAATAGGAGTGGAGGAG	CG6841RP	CCATCAGCCAGAGAATCTC
CG10279FP	TCAAGCAGCTTGCCGAGGAC	CG10279RP	TGAATAGCTCCACAACGGAC
CG8019FP	TGGGACTGCAAACCCATGAC	CG8019RP	GTAATAGCCTTGCCGTCCAG
CG4816FP	GCCATCATGGAGGAGATC	CG4816RP	CGAAGTTGAACTTGGGATG
CG3584FP	TGCTCATCTTCAGAAGGAC	CG3584RP	CAGGTTGATGTATTTGGGAG
